# Supplementary material
Source: PubMed Central journal article supplement (PMC10113174)

## SUPPLEMENTARY MATERIAL

### SUPPLEMENTARY TABLES

**Supplementary Table 1.** Trial randomizations of the studied patient group with extended genetic profiling, those without genetic profiling and the overall transplant eligible group.

|                                                                                                        | <b>Extended genetic profiling (n=556)</b> | <b>No extended genetic profiling (n=888)</b> | <b>Total transplant eligible (n=1444)</b> |
|--------------------------------------------------------------------------------------------------------|-------------------------------------------|----------------------------------------------|-------------------------------------------|
| <b>Induction randomization</b>                                                                         |                                           |                                              |                                           |
| CTD                                                                                                    | 210 (37.8%)                               | 313 (35.2%)                                  | 523 (36.2%)                               |
| CRD                                                                                                    | 224 (40.3%)                               | 346 (39.0%)                                  | 570 (39.5%)                               |
| KCRD                                                                                                   | 122 (21.9%)                               | 229 (25.8%)                                  | 351 (24.3%)                               |
| <b>Induction consolidation (=intensification) randomization, including primary refractory patients</b> |                                           |                                              |                                           |
| No intensification                                                                                     | 456 (82.0%)                               | 758 (85.4%)                                  | 1214 (84.1%)                              |
| No consolidation chemotherapy                                                                          | 46 (8.3%)                                 | 59 (6.6%)                                    | 105 (7.3%)                                |
| CVD consolidation chemotherapy                                                                         | 50 (9.0%)                                 | 61 (6.9%)                                    | 111 (7.7%)                                |
| Did not undergo CVD randomization (primary refractory = NC or PD during induction)                     | 4 (0.7%)                                  | 10 (1.1%)                                    | 14 (1.0%)                                 |
| <b>Maintenance randomization</b>                                                                       |                                           |                                              |                                           |
| Observation                                                                                            | 197 (35.4%)                               | 321 (36.1%)                                  | 518 (35.9%)                               |
| Len maintenance <sup>1</sup>                                                                           | 359 (64.4%)                               | 567 (63.9%)                                  | 926 (64.1%)                               |

<sup>1</sup> Including patients randomized to lenalidomide/vorinostat

**Supplementary Table 2.** Clinical characteristics, maintenance randomization and response prior to maintenance randomization in relation to genetic hits.

| Characteristic                                      | N   | No hit<br>N = 285 <sup>1</sup> | Single hit<br>N = 177 <sup>1</sup> | Double hit<br>N = 94 <sup>1</sup> |
|-----------------------------------------------------|-----|--------------------------------|------------------------------------|-----------------------------------|
| Age                                                 | 556 | 59 (53, 65)                    | 60 (54, 64)                        | 59 (53, 64)                       |
| Sex                                                 | 556 | 186 (65%)                      | 115 (65%)                          | 59 (63%)                          |
| Maintenance randomization                           | 556 |                                |                                    |                                   |
| Len maintenance <sup>2</sup>                        |     | 171 (60%)                      | 123 (69%)                          | 65 (69%)                          |
| Observation                                         |     | 114 (40%)                      | 54 (31%)                           | 29 (31%)                          |
| Response pre-maintenance randomization <sup>3</sup> | 552 |                                |                                    |                                   |
| CR                                                  |     | 77 (27%)                       | 58 (33%)                           | 19 (21%)                          |
| VGPR                                                |     | 151 (53%)                      | 100 (56%)                          | 65 (71%)                          |
| PR                                                  |     | 54 (19%)                       | 19 (11%)                           | 6 (6.5%)                          |
| MR/PD                                               |     | 1 (0.4%)                       | 0 (0%)                             | 2 (2.2%)                          |
| Unknown                                             |     | 2                              | 0                                  | 2                                 |

<sup>1</sup>Statistics presented: median (IQR); n (%); <sup>2</sup>Including patients randomized to lenalidomide/vorinostat;

<sup>3</sup>as per International Myeloma Working Group response criteria

## SUPPLEMENTARY FIGURES

### Supplementary Figure 1: Outcome for overall group of 556 patients.

A)

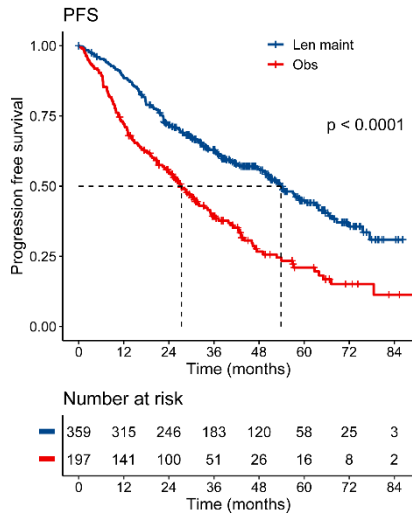

B)

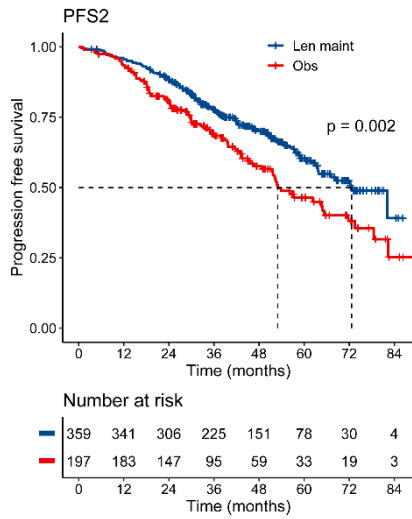

C)

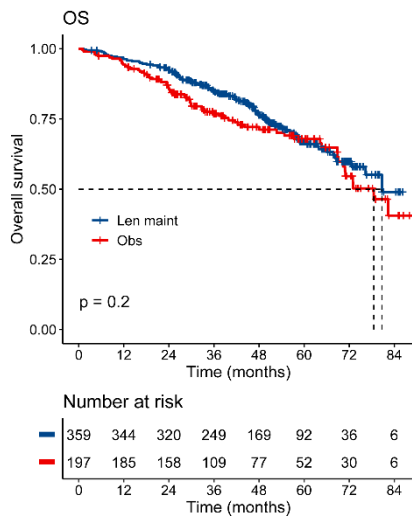

**Supplementary Figure 2: Outcome for patients with no hit, single hit or double hit in relation to maintenance randomization.** Kaplan-Meier plots for A)/C)/E) PFS and B)/D)/F) OS for patients randomized to Len maintenance (blue curves) or observation (red curves). P-values: Wald-P.

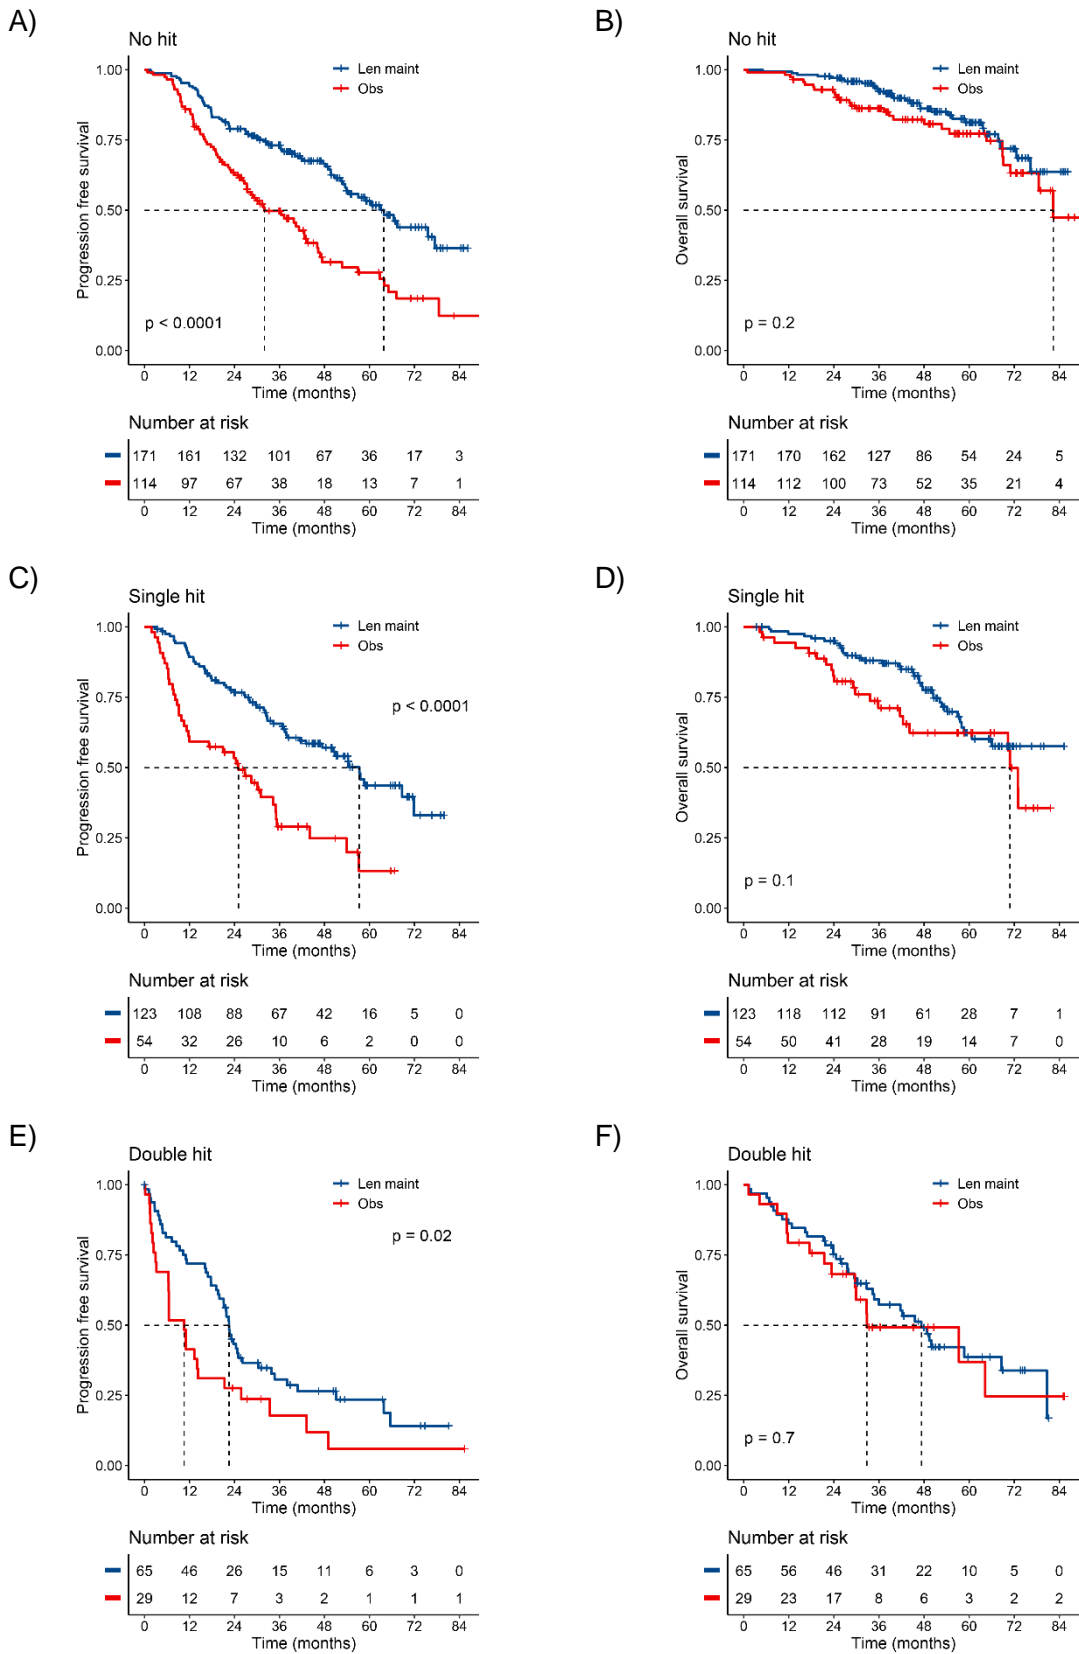

**Supplementary Figure 3: Outcome for patients with different copy number levels of 1q in relation to maintenance randomization.**

Kaplan-Meier plots for PFS for patients with A) three copies of 1q (gain(1q)) and B) four or more copies of 1q (amp(1q)). *P*-values: Wald-*P*.

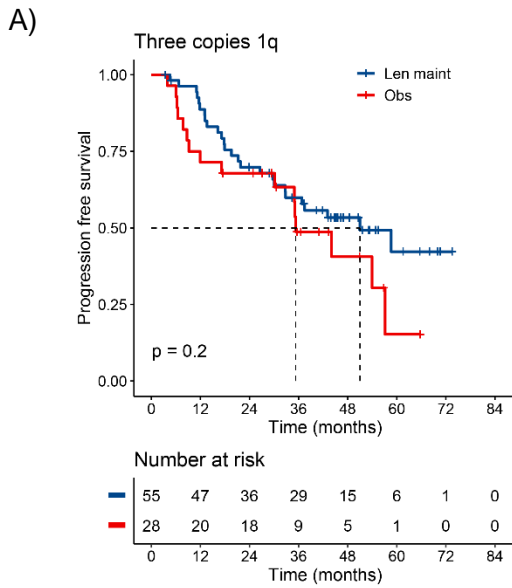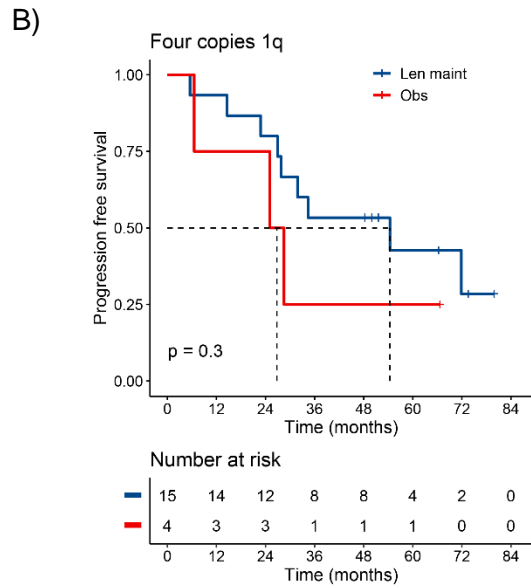

Supplement: BLOOD_BLD-2022-018339-mmc1.pdf [file BLOOD_BLD-2022-018339-mmc1.pdf]
